# Supplementary material for: Microbiota long-term dynamics and prediction of acute graft-versus-host disease in pediatric allogeneic stem cell transplantation
Source: Springer Nature journal article supplement (doi:10.1186/s40168-021-01100-2), 2021-06-28
Supplement: 40168_2021_1100_MOESM2_ESM.pdf [file 40168_2021_1100_MOESM2_ESM.pdf]

## Additional File 1 – Supplementary Tables

**Supplementary Table S1. Patient characteristics.** Abbreviations: HLA, human leukocyte antigen; TBI, total body irradiation; CY, Cyclophosphamide; VP16, Etoposide; BU, Busulfan; MEL, Melphalan; GvHD, graft-versus-host disease.

| Characteristics                |                                                     | Number of patients    | Percentage of all patients (%) |
|--------------------------------|-----------------------------------------------------|-----------------------|--------------------------------|
| Transplant recipients          |                                                     | 29                    | 100                            |
| Average recipient age in years |                                                     | 9.5 (Range: 2.5-16.4) | NA                             |
| Gut microbiota characterized   | At ≤ 6 timepoints                                   | 9                     | 31                             |
|                                | At 7-8 timepoints                                   | 13                    | 44.8                           |
|                                | At 9-10 timepoints                                  | 7                     | 24.1                           |
| Oral microbiota characterized  | At ≤ 6 timepoints                                   | 3                     | 10.3                           |
|                                | At 7-8 timepoints                                   | 11                    | 37.9                           |
|                                | At 9-10 timepoints                                  | 15                    | 51.7                           |
| Nasal microbiota characterized | At ≤ 6 timepoints                                   | 3                     | 10.3                           |
|                                | At 7-8 timepoints                                   | 9                     | 31                             |
|                                | At 9-10 timepoints                                  | 17                    | 58.6                           |
| Patient sex                    | Female                                              | 13                    | 44.8                           |
|                                | Male                                                | 16                    | 55.2                           |
| Disease at transplantation     | Malignant hematologic diseases                      | 20                    | 69                             |
|                                | Severe aplastic anemia                              | 1                     | 3.4                            |
|                                | Other benign disorders including immunodeficiencies | 8                     | 27.6                           |
| Donor type                     | HLA-matched sibling                                 | 14                    | 48.3                           |
|                                | HLA-matched unrelated donor (9/10 or 10/10 match)   | 12                    | 41.4                           |
|                                | Haplo-identical related donor (5/10 match)          | 3                     | 10.3                           |
| Stem cell source               | Bone marrow                                         | 23                    | 79.3                           |
|                                | Umbilical cord blood                                | 2                     | 6.9                            |
|                                | Peripheral blood                                    | 4                     | 13.8                           |
| Conditioning regimen           | TBI + CY / TBI + VP16                               | 6                     | 20.7                           |
|                                | Combinations of BU, CY, VP16 and MEL                | 6                     | 20.7                           |
|                                | Fludarabine-thiothepa combinations                  | 12                    | 41.4                           |

|                                                      |                                                    |    |      |
|------------------------------------------------------|----------------------------------------------------|----|------|
|                                                      | <b>Other combinations with fludarabine</b>         | 5  | 17.2 |
| <b>Anti-thymocyte globulin treatment</b>             |                                                    | 16 | 55.2 |
| <b>Antibiotics pre- and post-HSCT</b>                |                                                    | 29 | 100  |
| <b>Sex mismatch (female donor to male recipient)</b> |                                                    | 7  | 24.1 |
| <b>Acute GvHD</b>                                    | <b>Grade 0-I</b>                                   | 20 | 69   |
|                                                      | <b>Grade II-IV</b>                                 | 9  | 31   |
| <b>Infections</b>                                    | <b>At least one registered bacterial infection</b> | 25 | 86.2 |
|                                                      | <b>At least one registered viral infection</b>     | 29 | 100  |
|                                                      | <b>At least one registered fungal infection</b>    | 14 | 48.3 |
| <b>Overall Survival*</b>                             | <b>Alive</b>                                       | 26 | 89.7 |
|                                                      | <b>Dead</b>                                        | 3  | 10.3 |
| <b>Relapse of primary disease*</b>                   |                                                    | 2  | 6.9  |
| <b>Non-relapse mortality</b>                         |                                                    | 2  | 6.9  |
| <b>Re-transplantation</b>                            |                                                    | 1  | 3.4  |

\*Mean follow-up time after HSCT: 21.4 months (range: 10.1 – 32.7 months)

**Supplementary Table S2. Taxonomy of a subset of LDA clade members and corresponding LDA-coefficients in the gut, oral cavity, and nasal cavity.**

| ASV number | Body site  | Phylum            | Family                  | Genus/Species/Description      | LDA coefficient (beta) | Number of patients with presence of this ASV at $\geq 1$ time point |
|------------|------------|-------------------|-------------------------|--------------------------------|------------------------|---------------------------------------------------------------------|
|            | <b>Gut</b> |                   |                         |                                |                        |                                                                     |
| ASV_1      | gut        | <i>Firmicutes</i> | <i>Enterococcaceae</i>  | <i>Enterococcus</i> sp.        | 0.082                  | 29                                                                  |
| ASV_30     | gut        | <i>Firmicutes</i> | <i>Enterococcaceae</i>  | <i>Enterococcus</i> sp.        | 0.006                  | 26                                                                  |
| ASV_158    | gut        | <i>Firmicutes</i> | <i>Enterococcaceae</i>  | <i>Enterococcus</i> sp.        | 0.006                  | 13                                                                  |
| ASV_178    | gut        | <i>Firmicutes</i> | <i>Enterococcaceae</i>  | <i>Enterococcus</i> sp.        | 0.006                  | 12                                                                  |
| ASV_344    | gut        | <i>Firmicutes</i> | <i>Enterococcaceae</i>  | <i>Enterococcus</i> sp.        | 0.006                  | 8                                                                   |
| ASV_395    | gut        | <i>Firmicutes</i> | <i>Enterococcaceae</i>  | <i>Enterococcus</i> sp.        | 0.012                  | 14                                                                  |
| ASV_424    | gut        | <i>Firmicutes</i> | <i>Enterococcaceae</i>  | <i>Enterococcus</i> sp.        | 0.012                  | 9                                                                   |
| ASV_543    | gut        | <i>Firmicutes</i> | <i>Enterococcaceae</i>  | <i>Enterococcus</i> sp.        | 0.006                  | 7                                                                   |
| ASV_552    | gut        | <i>Firmicutes</i> | <i>Enterococcaceae</i>  | <i>Enterococcus avium</i>      | 0.006                  | 7                                                                   |
| ASV_720    | gut        | <i>Firmicutes</i> | <i>Enterococcaceae</i>  | <i>Enterococcus</i> sp.        | 0.078                  | 15                                                                  |
| ASV_730    | gut        | <i>Firmicutes</i> | <i>Enterococcaceae</i>  | <i>Enterococcus</i> sp.        | 0.006                  | 12                                                                  |
| ASV_784    | gut        | <i>Firmicutes</i> | <i>Enterococcaceae</i>  | <i>Enterococcus</i> sp.        | 0.006                  | 8                                                                   |
| ASV_951    | gut        | <i>Firmicutes</i> | <i>Enterococcaceae</i>  | <i>Enterococcus</i> sp.        | 0.006                  | 12                                                                  |
| ASV_1186   | gut        | <i>Firmicutes</i> | <i>Enterococcaceae</i>  | <i>Melissococcus</i> sp.       | 0.006                  | 9                                                                   |
| ASV_3      | gut        | <i>Firmicutes</i> | <i>Lactobacillaceae</i> | <i>Lactobacillus</i> sp.       | 0.011                  | 26                                                                  |
| ASV_31     | gut        | <i>Firmicutes</i> | <i>Lactobacillaceae</i> | <i>Lactobacillus</i> sp.       | 0.006                  | 11                                                                  |
| ASV_67     | gut        | <i>Firmicutes</i> | <i>Lactobacillaceae</i> | <i>Lactobacillus sakei</i>     | 0.006                  | 15                                                                  |
| ASV_74     | gut        | <i>Firmicutes</i> | <i>Lactobacillaceae</i> | <i>Lactobacillus</i> sp.       | 0.006                  | 16                                                                  |
| ASV_144    | gut        | <i>Firmicutes</i> | <i>Lactobacillaceae</i> | <i>Pediococcus</i> sp.         | 0.006                  | 10                                                                  |
| ASV_151    | gut        | <i>Firmicutes</i> | <i>Lactobacillaceae</i> | <i>Pediococcus pentosaceus</i> | 0.006                  | 12                                                                  |
| ASV_189    | gut        | <i>Firmicutes</i> | <i>Lactobacillaceae</i> | <i>Lactobacillus</i> sp.       | 0.006                  | 10                                                                  |
| ASV_222    | gut        | <i>Firmicutes</i> | <i>Lactobacillaceae</i> | <i>Lactobacillus rhamnosus</i> | 0.006                  | 8                                                                   |
| ASV_586    | gut        | <i>Firmicutes</i> | <i>Lactobacillaceae</i> | <i>Lactobacillus</i> sp.       | 0.006                  | 9                                                                   |
| ASV_78     | gut        | <i>Firmicutes</i> | <i>Lachnospiraceae</i>  | <i>Blautia</i> sp.             | -0.039                 | 26                                                                  |
| ASV_237    | gut        | <i>Firmicutes</i> | <i>Lachnospiraceae</i>  | <i>Blautia faecis</i>          | -0.026                 | 23                                                                  |
| ASV_265    | gut        | <i>Firmicutes</i> | <i>Lachnospiraceae</i>  | <i>Blautia</i> sp.             | -0.026                 | 24                                                                  |
| ASV_271    | gut        | <i>Firmicutes</i> | <i>Lachnospiraceae</i>  | <i>Blautia obeum</i>           | -0.026                 | 12                                                                  |
| ASV_375    | gut        | <i>Firmicutes</i> | <i>Lachnospiraceae</i>  | <i>Blautia</i> sp.             | -0.026                 | 15                                                                  |
| ASV_554    | gut        | <i>Firmicutes</i> | <i>Lachnospiraceae</i>  | <i>Blautia</i> sp.             | -0.026                 | 16                                                                  |
| ASV_1291   | gut        | <i>Firmicutes</i> | <i>Lachnospiraceae</i>  | <i>Blautia</i> sp.             | -0.026                 | 9                                                                   |
| ASV_132    | gut        | <i>Firmicutes</i> | <i>Ruminococcaceae</i>  | <i>Ruminococcus bromii</i>     | -0.007                 | 16                                                                  |
| ASV_192    | gut        | <i>Firmicutes</i> | <i>Ruminococcaceae</i>  | <i>Ruminococcus bromii</i>     | -0.007                 | 24                                                                  |
| ASV_206    | gut        | <i>Firmicutes</i> | <i>Ruminococcaceae</i>  | DTU089                         | -0.024                 | 23                                                                  |
| ASV_306    | gut        | <i>Firmicutes</i> | <i>Ruminococcaceae</i>  | <i>Ruminococcus</i> sp.        | -0.007                 | 13                                                                  |

|          |             |                       |                         |                                  |        |    |
|----------|-------------|-----------------------|-------------------------|----------------------------------|--------|----|
| ASV_348  | gut         | <i>Firmicutes</i>     | <i>Ruminococcaceae</i>  | <i>Ruminococcus</i> sp.          | -0.007 | 11 |
| ASV_556  | gut         | <i>Firmicutes</i>     | <i>Ruminococcaceae</i>  | <i>Caproiciproducens</i> sp.     | -0.024 | 9  |
| ASV_566  | gut         | <i>Firmicutes</i>     | <i>Ruminococcaceae</i>  | <i>Ruminoclostridium</i> sp.     | -0.024 | 13 |
| ASV_583  | gut         | <i>Firmicutes</i>     | <i>Ruminococcaceae</i>  | <i>Ruminoclostridium</i> sp.     | -0.024 | 23 |
| ASV_682  | gut         | <i>Firmicutes</i>     | <i>Ruminococcaceae</i>  | <i>Caproiciproducens</i> sp.     | -0.024 | 9  |
| ASV_750  | gut         | <i>Firmicutes</i>     | <i>Ruminococcaceae</i>  | <i>Caproiciproducens</i> sp.     | -0.024 | 13 |
| ASV_792  | gut         | <i>Firmicutes</i>     | <i>Ruminococcaceae</i>  | <i>Ruminoclostridium</i> sp.     | -0.024 | 15 |
|          | <b>Oral</b> |                       |                         |                                  |        |    |
| ASV_18   | oral        | <i>Actinobacteria</i> | <i>Actinomycetaceae</i> | <i>Actinomyces</i> sp.           | 0.021  | 27 |
| ASV_66   | oral        | <i>Actinobacteria</i> | <i>Actinomycetaceae</i> | <i>Actinomyces</i> sp.           | 0.003  | 26 |
| ASV_117  | oral        | <i>Actinobacteria</i> | <i>Actinomycetaceae</i> | <i>Actinomyces naeslundii</i>    | 0.016  | 27 |
| ASV_126  | oral        | <i>Actinobacteria</i> | <i>Actinomycetaceae</i> | <i>Actinomyces naeslundii</i>    | 0.016  | 19 |
| ASV_138  | oral        | <i>Actinobacteria</i> | <i>Actinomycetaceae</i> | <i>Actinomyces</i> sp.           | 0.003  | 22 |
| ASV_155  | oral        | <i>Actinobacteria</i> | <i>Actinomycetaceae</i> | <i>Actinomyces odontolyticus</i> | 0.003  | 20 |
| ASV_227  | oral        | <i>Actinobacteria</i> | <i>Actinomycetaceae</i> | <i>Actinomyces</i> sp.           | 0.016  | 7  |
| ASV_235  | oral        | <i>Actinobacteria</i> | <i>Actinomycetaceae</i> | F0332                            | 0.003  | 18 |
| ASV_262  | oral        | <i>Actinobacteria</i> | <i>Actinomycetaceae</i> | <i>Actinomyces</i> sp.           | 0.003  | 18 |
| ASV_345  | oral        | <i>Actinobacteria</i> | <i>Actinomycetaceae</i> | <i>Actinomyces</i> sp.           | 0.016  | 9  |
| ASV_389  | oral        | <i>Actinobacteria</i> | <i>Actinomycetaceae</i> | <i>Actinomyces odontolyticus</i> | 0.003  | 7  |
| ASV_403  | oral        | <i>Actinobacteria</i> | <i>Actinomycetaceae</i> | <i>Actinomyces</i> sp.           | 0.003  | 15 |
| ASV_407  | oral        | <i>Actinobacteria</i> | <i>Actinomycetaceae</i> | <i>Actinomyces</i> sp.           | 0.016  | 7  |
| ASV_2693 | oral        | <i>Actinobacteria</i> | <i>Actinomycetaceae</i> | <i>Actinomyces</i> sp.           | 0.021  | 5  |
| ASV_422  | oral        | <i>Actinobacteria</i> | <i>Actinomycetaceae</i> | <i>Actinomyces odontolyticus</i> | 0.003  | 15 |
| ASV_431  | oral        | <i>Actinobacteria</i> | <i>Actinomycetaceae</i> | <i>Actinomyces</i> sp.           | 0.016  | 12 |
| ASV_2697 | oral        | <i>Actinobacteria</i> | <i>Actinomycetaceae</i> | <i>Actinomyces naeslundii</i>    | 0.016  | 9  |
| ASV_461  | oral        | <i>Actinobacteria</i> | <i>Actinomycetaceae</i> | <i>Actinomyces</i> sp.           | 0.003  | 11 |
| ASV_475  | oral        | <i>Actinobacteria</i> | <i>Actinomycetaceae</i> | <i>Actinomyces gerencseriae</i>  | 0.003  | 6  |
| ASV_484  | oral        | <i>Actinobacteria</i> | <i>Actinomycetaceae</i> | <i>Actinomyces</i> sp.           | 0.003  | 4  |
| ASV_501  | oral        | <i>Actinobacteria</i> | <i>Actinomycetaceae</i> | <i>Actinomyces odontolyticus</i> | 0.003  | 13 |
| ASV_516  | oral        | <i>Actinobacteria</i> | <i>Actinomycetaceae</i> | <i>Actinomyces odontolyticus</i> | 0.003  | 12 |
| ASV_2700 | oral        | <i>Actinobacteria</i> | <i>Actinomycetaceae</i> | <i>Actinomyces gerencseriae</i>  | 0.003  | 14 |
| ASV_568  | oral        | <i>Actinobacteria</i> | <i>Actinomycetaceae</i> | <i>Actinomyces</i> sp.           | 0.003  | 12 |
| ASV_600  | oral        | <i>Actinobacteria</i> | <i>Actinomycetaceae</i> | <i>Actinomyces</i> sp.           | 0.003  | 7  |
| ASV_642  | oral        | <i>Actinobacteria</i> | <i>Actinomycetaceae</i> | <i>Actinomyces</i> sp.           | 0.003  | 7  |
| ASV_798  | oral        | <i>Actinobacteria</i> | <i>Actinomycetaceae</i> | F0332                            | 0.003  | 10 |
| ASV_871  | oral        | <i>Actinobacteria</i> | <i>Actinomycetaceae</i> | <i>Actinomyces massiliensis</i>  | 0.003  | 13 |
| ASV_2729 | oral        | <i>Actinobacteria</i> | <i>Actinomycetaceae</i> | <i>Actinomyces graevenitzii</i>  | 0.003  | 9  |
| ASV_1055 | oral        | <i>Actinobacteria</i> | <i>Actinomycetaceae</i> | <i>Actinomyces</i> sp.           | 0.003  | 6  |

|          |              |                       |                           |                                    |       |    |
|----------|--------------|-----------------------|---------------------------|------------------------------------|-------|----|
| ASV_1172 | oral         | <i>Actinobacteria</i> | <i>Actinomycetaceae</i>   | <i>Actinomyces</i> sp.             | 0.003 | 7  |
| ASV_2751 | oral         | <i>Actinobacteria</i> | <i>Actinomycetaceae</i>   | <i>Actinomyces</i> sp.             | 0.016 | 8  |
| ASV_2664 | oral         | <i>Firmicutes</i>     | <i>Streptococcaceae</i>   | <i>Streptococcus</i> sp.           | 0.010 | 29 |
| ASV_10   | oral         | <i>Firmicutes</i>     | <i>Streptococcaceae</i>   | <i>Streptococcus</i> sp.           | 0.010 | 29 |
| ASV_16   | oral         | <i>Firmicutes</i>     | <i>Streptococcaceae</i>   | <i>Streptococcus</i> sp.           | 0.010 | 29 |
| ASV_27   | oral         | <i>Firmicutes</i>     | <i>Streptococcaceae</i>   | <i>Streptococcus</i> sp.           | 0.010 | 29 |
| ASV_28   | oral         | <i>Firmicutes</i>     | <i>Streptococcaceae</i>   | <i>Streptococcus</i> sp.           | 0.040 | 28 |
| ASV_37   | oral         | <i>Firmicutes</i>     | <i>Streptococcaceae</i>   | <i>Streptococcus</i> sp.           | 0.010 | 19 |
| ASV_48   | oral         | <i>Firmicutes</i>     | <i>Streptococcaceae</i>   | <i>Streptococcus</i> sp.           | 0.010 | 27 |
| ASV_173  | oral         | <i>Firmicutes</i>     | <i>Streptococcaceae</i>   | <i>Streptococcus salivarius</i>    | 0.010 | 15 |
| ASV_183  | oral         | <i>Firmicutes</i>     | <i>Streptococcaceae</i>   | <i>Streptococcus</i> sp.           | 0.010 | 19 |
| ASV_188  | oral         | <i>Firmicutes</i>     | <i>Streptococcaceae</i>   | <i>Streptococcus</i> sp.           | 0.010 | 14 |
| ASV_2674 | oral         | <i>Firmicutes</i>     | <i>Streptococcaceae</i>   | <i>Streptococcus</i> sp.           | 0.010 | 14 |
| ASV_230  | oral         | <i>Firmicutes</i>     | <i>Streptococcaceae</i>   | <i>Streptococcus</i> sp.           | 0.010 | 8  |
| ASV_269  | oral         | <i>Firmicutes</i>     | <i>Streptococcaceae</i>   | <i>Streptococcus cristatus</i>     | 0.010 | 29 |
| ASV_282  | oral         | <i>Firmicutes</i>     | <i>Streptococcaceae</i>   | <i>Streptococcus parasanguinis</i> | 0.010 | 13 |
| ASV_2683 | oral         | <i>Firmicutes</i>     | <i>Streptococcaceae</i>   | <i>Streptococcus mitis</i>         | 0.010 | 11 |
| ASV_480  | oral         | <i>Firmicutes</i>     | <i>Streptococcaceae</i>   | <i>Streptococcus</i> sp.           | 0.010 | 18 |
| ASV_481  | oral         | <i>Firmicutes</i>     | <i>Streptococcaceae</i>   | <i>Streptococcus peroris</i>       | 0.010 | 12 |
| ASV_802  | oral         | <i>Firmicutes</i>     | <i>Streptococcaceae</i>   | <i>Streptococcus</i> sp.           | 0.010 | 24 |
| ASV_1531 | oral         | <i>Firmicutes</i>     | <i>Streptococcaceae</i>   | <i>Streptococcus</i> sp.           | 0.010 | 11 |
| ASV_1599 | oral         | <i>Firmicutes</i>     | <i>Streptococcaceae</i>   | <i>Streptococcus</i> sp.           | 0.010 | 13 |
| ASV_42   | oral         | <i>Bacteroidetes</i>  | <i>Prevotellaceae</i>     | <i>Prevotella melaninogenica</i>   | 0.028 | 27 |
| ASV_226  | oral         | <i>Bacteroidetes</i>  | <i>Prevotellaceae</i>     | <i>Prevotella melaninogenica</i>   | 0.028 | 15 |
| ASV_800  | oral         | <i>Bacteroidetes</i>  | <i>Prevotellaceae</i>     | <i>Prevotella</i> sp.              | 0.028 | 6  |
| ASV_2665 | oral         | <i>Firmicutes</i>     | Family XI                 | <i>Gemella</i> sp.                 | 0.009 | 29 |
| ASV_208  | oral         | <i>Firmicutes</i>     | Family XI                 | <i>Gemella sanguinis</i>           | 0.009 | 28 |
| ASV_2701 | oral         | <i>Firmicutes</i>     | Family XI                 | <i>Gemella</i> sp.                 | 0.009 | 5  |
|          | <b>Nasal</b> |                       |                           |                                    |       |    |
| ASV_14   | nasal        | <i>Actinobacteria</i> | <i>Corynebacteriaceae</i> | <i>Corynebacterium</i> sp.         | 0.117 | 24 |
| ASV_354  | nasal        | <i>Actinobacteria</i> | <i>Corynebacteriaceae</i> | <i>Corynebacterium durum</i>       | 0.054 | 15 |
| ASV_360  | nasal        | <i>Actinobacteria</i> | <i>Corynebacteriaceae</i> | <i>Corynebacterium</i> sp.         | 0.054 | 17 |
| ASV_2704 | nasal        | <i>Actinobacteria</i> | <i>Corynebacteriaceae</i> | <i>Corynebacterium</i> sp.         | 0.022 | 12 |
| ASV_2707 | nasal        | <i>Actinobacteria</i> | <i>Corynebacteriaceae</i> | <i>Corynebacterium durum</i>       | 0.054 | 14 |
| ASV_1206 | nasal        | <i>Actinobacteria</i> | <i>Corynebacteriaceae</i> | <i>Lawsonella</i> sp.              | 0.007 | 16 |

**Supplementary Table S3. Taxonomy of aGvHD predictors within the fecal, oral, and nasal microbiota.**

ASVs that were significantly predicting aGvHD severity according to the conditional inference tree regression model are highlighted in bold. Of the 50 most important gut ASVs identified by the svmLinear model, 17 were confirmed by Boruta feature selection and are listed here. In the oral and nasal cavities, 26 and 12 ASVs were confirmed by Boruta selection, respectively. Listed in bold are those ASVs with a significant predictive effect on aGvHD severity, tested in a regression framework with CTREE (see Methods).

| ASV number     | Phylum               | Family                  | Genus/Species/Description                | Body Site | Importance in svmLinear model | Mean Importance in Boruta |
|----------------|----------------------|-------------------------|------------------------------------------|-----------|-------------------------------|---------------------------|
|                | <b>Gut</b>           |                         |                                          |           |                               |                           |
| <b>ASV_3</b>   | <b>Firmicutes</b>    | <b>Lactobacillaceae</b> | <b>Lactobacillus sp.</b>                 | gut       | <b>0.74</b>                   | <b>8.85</b>               |
| ASV_7          | Bacteroidetes        | Tannerellaceae          | Parabacteroides merdae                   | gut       | 0.63                          | 4.62                      |
| ASV_8          | Proteobacteria       | Enterobacteriaceae      | Escherichia/Shigella sp.                 | gut       | 0.70                          | 4.16                      |
| ASV_12         | Firmicutes           | Ruminococcaceae         | UBA1819 sp.                              | gut       | 0.68                          | 5.52                      |
| ASV_35         | Bacteroidetes        | Bacteroidaceae          | Bacteroides uniformis                    | gut       | 0.68                          | 4.66                      |
| ASV_50         | Firmicutes           | Ruminococcaceae         | Subdoligranulum sp.                      | gut       | 0.60                          | 3.78                      |
| <b>ASV_128</b> | <b>Bacteroidetes</b> | <b>Tannerellaceae</b>   | <b>Parabacteroides distasonis</b>        | gut       | <b>0.68</b>                   | <b>7.42</b>               |
| ASV_131        | Bacteroidetes        | Tannerellaceae          | Parabacteroides distasonis               | gut       | 0.66                          | 6.49                      |
| ASV_166        | Fusobacteria         | Fusobacteriaceae        | Fusobacterium sp.                        | gut       | 0.60                          | 4.08                      |
| <b>ASV_268</b> | <b>Firmicutes</b>    | <b>Lachnospiraceae</b>  | <b>Lachnospiraceae_NK4A136_group sp.</b> | gut       | <b>0.61</b>                   | <b>5.02</b>               |
| ASV_361        | Bacteroidetes        | Tannerellaceae          | Parabacteroides sp.                      | gut       | 0.61                          | 4.40                      |
| ASV_477        | Firmicutes           | Lachnospiraceae         | Eisenbergiella tayi                      | gut       | 0.62                          | 3.64                      |
| ASV_507        | Firmicutes           | Lachnospiraceae         | Lachnospira pectinoschiza                | gut       | 0.60                          | 3.91                      |
| ASV_563        | Firmicutes           | Erysipelotrichaceae     | Coprobacillus cateniformis               | gut       | 0.63                          | 5.38                      |
| ASV_567        | Firmicutes           | Ruminococcaceae         | Flavonifractor sp.                       | gut       | 0.60                          | 2.81                      |
| ASV_585        | Bacteroidetes        | Tannerellaceae          | Parabacteroides sp.                      | gut       | 0.62                          | 4.53                      |
| ASV_687        | Firmicutes           | Lachnospiraceae         | NA                                       | gut       | 0.59                          | 3.83                      |
|                | <b>Oral</b>          |                         |                                          |           |                               |                           |
| ASV_15         | Firmicutes           | Streptococcaceae        | Lactococcus sp.                          | oral      | 0.61                          | 7.31                      |
| ASV_34         | Proteobacteria       | Neisseriaceae           | Neisseria sp.                            | oral      | 0.62                          | 5.08                      |
| ASV_66         | Actinobacteria       | Actinomycetaceae        | Actinomyces sp.                          | oral      | 0.65                          | 4.84                      |
| ASV_72         | Actinobacteria       | Micrococcaceae          | Rothia sp.                               | oral      | 0.63                          | 4.49                      |
| ASV_92         | Bacteroidetes        | Bacteroidaceae          | Bacteroides sp.                          | oral      | 0.65                          | 5.36                      |
| ASV_98         | Actinobacteria       | Micrococcaceae          | Rothia mucilaginoso                      | oral      | 0.58                          | 5.87                      |
| ASV_135        | Firmicutes           | Streptococcaceae        | Streptococcus mutans                     | oral      | 0.60                          | 4.24                      |

|                |                              |                                    |                                                                                      |              |             |             |
|----------------|------------------------------|------------------------------------|--------------------------------------------------------------------------------------|--------------|-------------|-------------|
| ASV_205        | <i>Firmicutes</i>            | <i>Ruminococcaceae</i>             | <i>Ruminococcacea</i><br><i>e_UCG-002</i> sp.                                        | oral         | 0.63        | 4.38        |
| <b>ASV_226</b> | <b><i>Bacteroidetes</i></b>  | <b><i>Prevotellaceae</i></b>       | <b><i>Prevotella_7</i></b><br><b><i>melaninogenica</i></b>                           | <b>oral</b>  | <b>0.63</b> | <b>8.19</b> |
| ASV_247        | <i>Firmicutes</i>            | <i>Ruminococcaceae</i>             | <i>Ruminococcacea</i><br><i>e_UCG-013</i> sp.                                        | oral         | 0.66        | 4.80        |
| ASV_270        | <i>Firmicutes</i>            | <i>Veillonellaceae</i>             | <i>Veillonella</i> sp.                                                               | oral         | 0.59        | 3.47        |
| ASV_338        | <i>Bacteroidetes</i>         | <i>Prevotellaceae</i>              | <i>Alloprevotella</i> sp.                                                            | oral         | 0.61        | 4.26        |
| ASV_360        | <i>Actinobacteria</i>        | <i>Corynebacteriaceae</i>          | <i>Corynebacterium</i><br>sp.                                                        | oral         | 0.64        | 6.50        |
| ASV_374        | <i>Fusobacteria</i>          | <i>Leptotrichiaceae</i>            | <i>Leptotrichia</i><br><i>wadei</i>                                                  | oral         | 0.60        | 4.39        |
| ASV_378        | <i>Firmicutes</i>            | <i>Lachnospiraceae</i>             | <i>Oribacterium</i><br><i>sinus</i>                                                  | oral         | 0.65        | 7.17        |
| <b>ASV_500</b> | <b><i>Actinobacteria</i></b> | <b><i>Propionibacteriaceae</i></b> | <b><i>Pseudopropionib</i></b><br><b><i>acterium</i></b><br><b><i>propionicum</i></b> | <b>oral</b>  | <b>0.67</b> | <b>8.51</b> |
| ASV_518        | <i>Bacteroidetes</i>         | <i>Bacteroidaceae</i>              | <i>Bacteroides</i> sp.                                                               | oral         | 0.64        | 4.67        |
| <b>ASV_568</b> | <b><i>Actinobacteria</i></b> | <b><i>Actinomycetaceae</i></b>     | <b><i>Actinomyces</i> sp.</b>                                                        | <b>oral</b>  | <b>0.71</b> | <b>8.79</b> |
| ASV_640        | <i>Bacteroidetes</i>         | <i>Tannerellaceae</i>              | <i>Parabacteroides</i><br>sp.                                                        | oral         | 0.62        | 2.81        |
| ASV_871        | <i>Actinobacteria</i>        | <i>Actinomycetaceae</i>            | <i>Actinomyces</i><br><i>massiliensis</i>                                            | oral         | 0.61        | 4.65        |
| ASV_894        | <i>Firmicutes</i>            | <i>Ruminococcaceae</i>             | <i>Ruminococcacea</i><br><i>e_UCG-014</i> sp.                                        | oral         | 0.62        | 2.74        |
| ASV_140<br>3   | <i>Firmicutes</i>            | <i>Veillonellaceae</i>             | <i>Selenomonas_3</i><br>sp.                                                          | oral         | 0.59        | 2.82        |
| ASV_266<br>4   | <i>Firmicutes</i>            | <i>Streptococcaceae</i>            | <i>Streptococcus</i> sp.                                                             | oral         | 0.68        | 6.11        |
| ASV_266<br>6   | <i>Actinobacteria</i>        | <i>Micrococcaceae</i>              | <i>Rothia</i><br><i>dentocariosa</i>                                                 | oral         | 0.61        | 4.47        |
| ASV_267<br>6   | <i>Firmicutes</i>            | <i>Aerococcaceae</i>               | <i>Abiotrophia</i><br><i>defectiva</i>                                               | oral         | 0.61        | 5.74        |
| ASV_269<br>2   | <i>Actinobacteria</i>        | <i>Micrococcaceae</i>              | <i>Rothia</i> sp.                                                                    | oral         | 0.62        | 6.30        |
|                | <b>Nasal</b>                 |                                    |                                                                                      |              |             |             |
| ASV_266<br>4   | <i>Firmicutes</i>            | <i>Streptococcaceae</i>            | <i>Streptococcus</i> sp.                                                             | nasal        | 0.61        | 11.49       |
| ASV_266<br>6   | <i>Actinobacteria</i>        | <i>Micrococcaceae</i>              | <i>Rothia</i><br><i>dentocariosa</i>                                                 | nasal        | 0.56        | 5.80        |
| <b>ASV_47</b>  | <b><i>Actinobacteria</i></b> | <b><i>Micrococcaceae</i></b>       | <b><i>Rothia</i> sp.</b>                                                             | <b>nasal</b> | <b>0.59</b> | <b>6.41</b> |
| ASV_51         | <i>Proteobacteria</i>        | <i>Pasteurellaceae</i>             | <i>Haemophilus</i> sp.                                                               | nasal        | 0.64        | 5.67        |
| ASV_52         | <i>Actinobacteria</i>        | <i>Micrococcaceae</i>              | <i>Rothia</i><br><i>mucilaginoso</i>                                                 | nasal        | 0.61        | 8.58        |
| <b>ASV_66</b>  | <b><i>Actinobacteria</i></b> | <b><i>Actinomycetaceae</i></b>     | <b><i>Actinomyces</i> sp.</b>                                                        | <b>nasal</b> | <b>0.67</b> | <b>9.05</b> |
| ASV_267<br>0   | <i>Proteobacteria</i>        | <i>Neisseriaceae</i>               | NA                                                                                   | nasal        | 0.61        | 6.69        |
| ASV_117        | <i>Actinobacteria</i>        | <i>Actinomycetaceae</i>            | <i>Actinomyces</i><br><i>naeslundii</i>                                              | nasal        | 0.58        | 4.73        |
| ASV_125        | <i>Actinobacteria</i>        | <i>Corynebacteriaceae</i>          | <i>Corynebacterium</i><br><i>_1</i> <i>accolens</i>                                  | nasal        | 0.57        | 5.43        |
| ASV_252        | <i>Firmicutes</i>            | <i>Veillonellaceae</i>             | <i>Veillonella</i><br><i>rogosae</i>                                                 | nasal        | 0.58        | 5.54        |
| ASV_270        | <i>Firmicutes</i>            | <i>Veillonellaceae</i>             | <i>Veillonella</i> sp.                                                               | nasal        | 0.57        | 5.41        |

|              |                       |                           |                       |       |      |      |
|--------------|-----------------------|---------------------------|-----------------------|-------|------|------|
| ASV_269<br>4 | <i>Actinobacteria</i> | <i>Corynebacteriaceae</i> | <i>Lawsonella</i> sp. | nasal | 0.65 | 8.42 |
|--------------|-----------------------|---------------------------|-----------------------|-------|------|------|
