# Supplementary material for: Microbiota long-term dynamics and prediction of acute graft-versus-host disease in pediatric allogeneic stem cell transplantation
Source: Springer Nature journal article supplement (doi:10.1186/s40168-021-01100-2), 2021-06-28
Supplement: 40168_2021_1100_MOESM4_ESM.pdf [file 40168_2021_1100_MOESM4_ESM.pdf]

### 1 Additional File 3 – Supplementary Discussion

2

3 We found that the patients for which we observed these associations were frequently treated with  
4 vancomycin, ciprofloxacin, and especially ceftazidime at time points early post-HSCT. This is in contrast  
5 to our previous study that revealed high *Lachnospiraceae* and *Ruminococcaceae* abundances and  
6 rapid B and NK cell reconstitution in the absence of vancomycin and ciprofloxacin treatment [1].  
7 Vancomycin and ciprofloxacin are among the broad-spectrum antibiotics that have previously been  
8 attributed a detrimental effect on the commensal microbiota, especially on *Clostridiales* [1–3]. The  
9 effect of ceftazidime however is controversially discussed. On the one hand, commensal sparing has  
10 previously been observed for cefepime, which belongs to the same antibiotic class as ceftazidime  
11 (cephalosporins) [4]. On the other hand, ceftazidime treatment could not rescue bacterial alpha  
12 diversity compared with e.g. vancomycin or ciprofloxacin treatment in a previous report [2]. In the  
13 present study, high abundances of clostridial microbiota members despite vancomycin and  
14 ciprofloxacin treatment might point to a potential beneficial effect of the additional treatment with  
15 ceftazidime. Moreover, future studies could assess if reconstitution in different NK cell subsets might  
16 differ with regards to time point and dependency on microbial composition and antimicrobial  
17 treatment.

18

19 We found that a specific *Parabacteroides distasonis* ASV (family *Tannerellaceae*) predicted moderate  
20 to severe aGvHD. In this context, it is interesting that our multivariate analyses indicated that a set of  
21 other *Parabacteroides* spp. ASVs was associated with high eosinophil counts from month +3 onwards.  
22 *Parabacteroides* members are providing the SCFA propionate which has previously been found to bind  
23 to the G 500 protein-coupled receptor GPR43 on eosinophils, although the exact mechanisms of  
24 GPR43-mediated immune modulation are yet to be investigated [5,6]. Interestingly, increased  
25 eosinophil numbers prior to and during aGvHD have been described before [7]. Therefore, an  
26 explanation for our prediction of moderate to severe aGvHD from high pre-HSCT *Parabacteroides* spp.  
27 abundances could involve a potential propionate-mediated activation of eosinophils, which might  
28 contribute to aGvHD. In contrast, propionate can also stimulate T<sub>reg</sub> cells, which in turn prevent T<sub>H</sub>17-  
29 induced inflammation involved in aGvHD [8,9]. We did not observe any correlation between  
30 *Parabacteroides* members and T cell counts in our study, however T cell subsets were measured after  
31 aGvHD and thus might be altered according to the inflammatory condition itself or its treatment.

32 In addition, a specific *Lachnospiraceae* ASV in the gut predicted subsequent moderate to severe  
33 aGvHD when highly abundant prior to HSCT. This family has previously been reported to be reduced  
34 prior to aGvHD (but post transplantation) [10,11]. However, here we examined pre-HSCT abundances  
35 to make predictions, i.e. we did not aim at elucidating *Lachnospiraceae* abundances concurrent to  
36 aGvHD. Particular members of this bacterial family are crucial producers of the SCFA butyrate, which  
37 has been suggested to prevent aGvHD directly by improving epithelial integrity in GvHD-target tissue,  
38 and/or indirectly by inducing T<sub>reg</sub> cells that reduce inflammation [9,12]. Of note, we did not observe  
39 any strong associations between bacterial abundances and inflammation (represented by CRP levels)  
40 at any body site in this study. It is of interest for future studies to reveal the exact mechanisms by  
41 which certain *Lachnospiraceae*, and specifically the predictive ASV we identified, might promote  
42 aGvHD, or whether their increase might be compensatory.

43

44 In addition to ASVs in the gut, we also identified oral and nasal cavity ASVs with pre-transplant  
45 abundances predicting subsequent aGvHD. For instance, in the oral cavity, an ASV affiliated with  
46 *Prevotella melaninogenica* strongly predicted aGvHD. This species is known to cause oral mucosal  
47 infections, and to be elevated in abundance in oral cancer [13,14]. Oral mucositis in allogeneic HSCT  
48 has been linked to elevated aGvHD risk [15,16]. It may be speculated that this could account for the  
49 observed association between aGvHD and high levels of this *Prevotella* ASV, although we did not  
50 investigate manifestations of mucositis in the present study. This highlights the need for direct  
51 evaluation of oral mucositis in this context.

52

53 Other microbial predictors of aGvHD in the oral and nasal cavity included members of the order  
54 *Actinomycetales* (*Actinomyces* spp., *Pseudopropionibacterium propionicum*, *Rothia* sp.). The order  
55 *Actinomycetales* comprises numerous commensals colonizing the oral and nasal cavities in healthy  
56 individuals, but can cause opportunistic infections in e.g. allo-HSCT patients [17]. It has been  
57 demonstrated that aGvHD increased the susceptibility to infections in allogeneic HSCT patients, but a  
58 predisposition to aGvHD due to a preceding infection has also been suggested for *Clostridium difficile*  
59 [18]. Whether actinomycosis might play a role in facilitating aGvHD development remains to be  
60 investigated. Interestingly, an increase of oral *Actinobacteria* in the gut at the time of neutrophil  
61 recovery has been found to be correlated with subsequent severe aGvHD [11]. One potential  
62 explanation involves the ability of *Actinomyces* spp. to drive biofilm formations, e.g. in periodontitis  
63 and during colorectal cancer [19].

64

65 Interestingly, among all ASVs significantly predicting aGvHD at any body site, we found only one ASV,  
66 namely a nasal *Rothia* sp. ASV, with high pre-HSCT abundances predicting that patients would be  
67 spared from subsequent aGvHD. *Rothia mucilaginosa* was among the species that, when present in  
68 the gut post-transplant, correlated with moderate to severe aGvHD in a previous study [11]. However,  
69 it has to date not been assessed in which way different *Rothia* species in the nasal cavity might be  
70 associated with aGvHD. This discrepancy again emphasizes the importance of high taxonomic  
71 resolution in this context, and the examination of the microbiota at different body sites.

72

73

74

## 75 **References**

76

- 77 1. Ingham AC, Kielsen K, Cilieborg MS, Lund O, Holmes S, Aarestrup FM, et al. Specific gut  
78 microbiome members are associated with distinct immune markers in pediatric allogeneic  
79 hematopoietic stem cell transplantation. *Microbiome* [Internet]. BioMed Central; 2019 [cited 2019  
80 Sep 18];7:131. Available from:  
81 <https://microbiomejournal.biomedcentral.com/articles/10.1186/s40168-019-0745-z>
- 82 2. Weber D, Hiergeist A, Weber M, Dettmer K, Wolff D, Hahn J, et al. Detrimental effect of broad-  
83 spectrum antibiotics on intestinal microbiome diversity in patients after allogeneic stem cell  
84 transplantation: Lack of commensal sparing antibiotics. *Clin Infect Dis* [Internet]. 2018 [cited 2018  
85 Sep 20]; Available from: <http://www.ncbi.nlm.nih.gov/pubmed/30124813>
- 86 3. Weber D, Jenq RR, Peled JU, Taur Y, Hiergeist A, Koestler J, et al. Microbiota Disruption Induced by  
87 Early Use of Broad Spectrum Antibiotics is an Independent Risk Factor of Outcome after Allogeneic  
88 Stem Cell Transplantation [Internet]. *Biol. Blood Marrow Transplant*. Elsevier Inc.; 2017. Available  
89 from: <http://linkinghub.elsevier.com/retrieve/pii/S1083879117302756>

- 90 4. Shono Y, Docampo MD, Peled JU, Perobelli SM, Velardi E, Tsai JJ, et al. Increased GVHD-related  
91 mortality with broad-spectrum antibiotic use after allogeneic hematopoietic stem cell  
92 transplantation in human patients and mice. *Sci Transl Med* [Internet]. 2016 [cited 2016 May  
93 23];8:339ra71-339ra71. Available from: <http://stm.sciencemag.org/content/8/339/339ra71>
- 94 5. Biagi E, Zama D, Nastasi C, Consolandi C, Fiori J, Rampelli S, et al. Gut microbiota trajectory in  
95 pediatric patients undergoing hematopoietic SCT. *Bone Marrow Transplant* [Internet]. Nature  
96 Publishing Group; 2015 [cited 2018 Jul 2];50:992–8. Available from:  
97 <http://www.nature.com/articles/bmt201516>
- 98 6. Maslowski KM, Vieira AT, Ng A, Kranich J, Sierro F, Yu D, et al. Regulation of inflammatory  
99 responses by gut microbiota and chemoattractant receptor GPR43. *Nature* [Internet]. NIH Public  
100 Access; 2009 [cited 2018 Oct 8];461:1282–6. Available from:  
101 <http://www.ncbi.nlm.nih.gov/pubmed/19865172>
- 102 7. Johnsson M, Cromvik J, Johansson J-E, Wennerås C, Vaht K. Eosinophils in the blood of  
103 hematopoietic stem cell transplanted patients are activated and have different molecular marker  
104 profiles in acute and chronic graft-versus-host disease. *Immunity, Inflamm Dis*. 2014;2:99–113.
- 105 8. Kverka M, Zakostelska Z, Klimesova K, Sokol D, Hudcovic T, Hrnčir T, et al. Oral administration of  
106 *Parabacteroides distasonis* antigens attenuates experimental murine colitis through modulation of  
107 immunity and microbiota composition. *Clin Exp Immunol* [Internet]. Wiley-Blackwell; 2011 [cited  
108 2018 Nov 19];163:250–9. Available from: <http://www.ncbi.nlm.nih.gov/pubmed/21087444>
- 109 9. Arpaia N, Campbell C, Fan X, Dikiy S, Van Der Veeken J, Deroos P, et al. Metabolites produced by  
110 commensal bacteria promote peripheral regulatory T-cell generation. *Nature* [Internet]. Nature  
111 Publishing Group; 2013;504:451–5. Available from: <http://dx.doi.org/10.1038/nature12726>
- 112 10. Han L, Jin H, Zhou L, Zhang X, Fan Z, Dai M, et al. Intestinal Microbiota at Engraftment Influence  
113 Acute Graft-Versus-Host Disease via the Treg/Th17 Balance in Allo-HSCT Recipients. *Front Immunol*  
114 [Internet]. 2018 [cited 2018 May 17];9:669. Available from:  
115 <http://www.ncbi.nlm.nih.gov/pubmed/29740427>
- 116 11. Golob JL, Pergam SA, Srinivasan S, Fiedler TL, Liu C, Garcia K, et al. Stool Microbiota at Neutrophil  
117 Recovery Is Predictive for Severe Acute Graft vs Host Disease After Hematopoietic Cell  
118 Transplantation. *Clin Infect Dis* [Internet]. Oxford University Press; 2017 [cited 2018 Nov  
119 23];65:1984–91. Available from: <https://academic.oup.com/cid/article/65/12/1984/4085173>
- 120 12. Mathewson ND, Jenq R, Mathew A V, Koenigskecht M, Hanash A, Toubai T, et al. Gut  
121 microbiome-derived metabolites modulate intestinal epithelial cell damage and mitigate graft-  
122 versus-host disease. *Nat Immunol* [Internet]. NIH Public Access; 2016 [cited 2018 May 15];17:505–  
123 13. Available from: <http://www.ncbi.nlm.nih.gov/pubmed/26998764>
- 124 13. Olczak-Kowalczyk D, Daszkiewicz M, Krasuska-Sławińska, Dembowska-Bagińska B, Gozdowski D,  
125 Daszkiewicz P, et al. Bacteria and *Candida* yeasts in inflammations of the oral mucosa in children  
126 with secondary immunodeficiency. *J Oral Pathol Med*. 2012;41:568–76.
- 127 14. Mager DL, Haffajee AD, Devlin PM, Norris CM, Posner MR, Goodson JM. The salivary microbiota  
128 as a diagnostic indicator of oral cancer: a descriptive, non-randomized study of cancer-free and oral  
129 squamous cell carcinoma subjects. *J Transl Med* [Internet]. BioMed Central; 2005 [cited 2018 Dec  
130 7];3:27. Available from: <http://www.ncbi.nlm.nih.gov/pubmed/15987522>
- 131 15. Correa ME, Schubert MM, Storer B, Martin PJ, Flowers MED. Correlation Between Severity of  
132 Oral Mucositis and Both Overall and Gut Acute GvHD After High Intensity Conditioning  
133 Hematopoietic Stem Cell Transplantation. *Blood* [Internet]. 2012 [cited 2018 Nov 25];120. Available  
134 from: <http://www.bloodjournal.org/content/120/21/3057?sso-checked=true>
- 135 16. Chaudhry HM, Bruce AJ, Wolf RC, Litzow MR, Hogan WJ, Patnaik MS, et al. The Incidence and

- 136 Severity of Oral Mucositis among Allogeneic Hematopoietic Stem Cell Transplantation Patients: A  
137 Systematic Review. *Biol Blood Marrow Transplant* [Internet]. Elsevier; 2016 [cited 2018 Nov  
138 25];22:605–16. Available from:  
139 <https://www.sciencedirect.com/science/article/pii/S1083879115006394>
- 140 17. Barraco F, Labussière-Wallet H, Valour F, Ducastelle-Leprêtre S, Nicolini FE, Thomas X, et al.  
141 Actinomycosis after allogeneic hematopoietic stem cell transplantation despite penicillin  
142 prophylaxis. *Transpl Infect Dis*. 2016;18:595–600.
- 143 18. Chakrabarti S, Lees A, Jones S, Milligan D. Clostridium difficile infection in allogeneic stem cell  
144 transplant recipients is associated with severe graft-versus-host disease and non-relapse mortality.  
145 *Bone Marrow Transplant* [Internet]. Nature Publishing Group; 2000 [cited 2018 Nov 26];26:871–6.  
146 Available from: <http://www.nature.com/articles/1702627>
- 147 19. Flynn KJ, Baxter NT, Schloss PD. Metabolic and Community Synergy of Oral Bacteria in Colorectal  
148 Cancer. *mSphere* [Internet]. American Society for Microbiology (ASM); 2016 [cited 2018 Nov 26];1.  
149 Available from: <http://www.ncbi.nlm.nih.gov/pubmed/27303740>
- 150
